# Supplementary material
Source: PubMed Central journal article supplement (PMC5899490)
Supplement: pnas.201800719SI.pdf [file pnas.201800719SI.pdf]

# Supporting Information

Sheng et al. 10.1073/pnas.1800719115

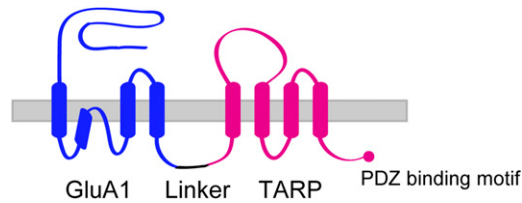

**Fig. S1.** The diagram of construction of the GluA1-TARP tethered receptor. The C-tail of GluA1 (blue) was fused to the N terminus of TARP (red) with a short segment of linker sequence (black). The PDZ-binding motif is highlighted by a filled circle.

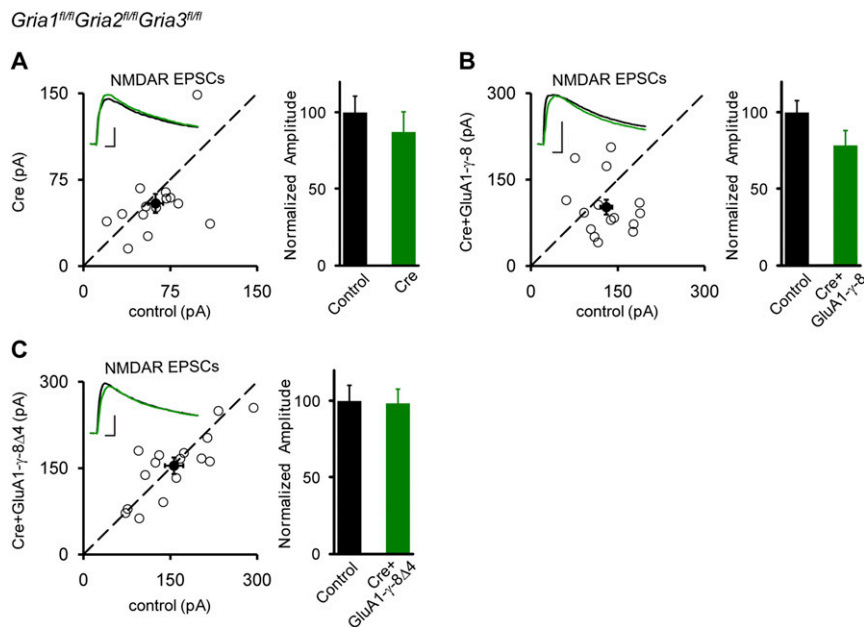

**Fig. S2.** NMDAR-mediated synaptic transmission is intact in experiments where AMPARs are knocked out or replaced with GluA1-TARP tethered receptors. Simultaneous dual whole-cell recordings from a transfected CA1 pyramidal neuron and a neighboring wild-type one from P17–P21 acute slices as in Fig. 1 A–C. Open and filled circles represent amplitudes of NMDAR-EPSCs (the current amplitudes were measured 100 ms after stimulation) for single pairs and mean  $\pm$  SEM, respectively. (Insets) Sample current traces from control (black) and experimental (green) cells. (Scale bars: 100 pA and 25 ms for representative traces.) Bar graphs show normalized EPSC amplitudes (mean  $\pm$  SEM) (Cre: A,  $n = 14$ ,  $87.31 \pm 13.21\%$  control,  $P > 0.05$ ; Cre+GluA1- $\gamma$ -8: B,  $n = 15$ ,  $78.46 \pm 9.91\%$  control,  $P > 0.05$ ; Cre+GluA1- $\gamma$ -8 $\Delta$ 4: C,  $n = 16$ ,  $98.49 \pm 9.13\%$  control,  $P > 0.05$ ) presented in scatter plots. All of the statistical analyses are compared with respective control neurons by the two-tailed Wilcoxon signed-rank sum test.

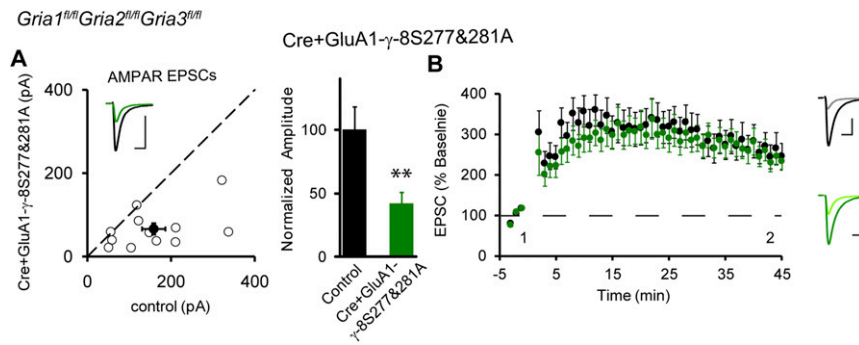

**Fig. 53.** Phosphorylation of  $\gamma$ -8 is involved in synaptic trafficking of the tethered GluA1 receptor but not required for LTP. The endogenous AMPARs were replaced with GluA1- $\gamma$ -8(S277&281A) as in Fig. 1B. (A) Open and filled circles represent amplitudes of AMPAR-EPSCs for single pairs and mean  $\pm$  SEM, respectively. (Insets) Sample current traces from control (black) and experimental (green) cells. (Scale bars: 100 pA and 25 ms for representative traces.) Bar graphs show normalized EPSC amplitudes (mean  $\pm$  SEM) ( $n = 12$ ,  $41.84 \pm 8.50\%$  control,  $**P < 0.005$ ) presented in scatter plots. (B) LTP of GluA1- $\gamma$ -8(S277&281A) replacement neurons ( $n = 10$ ) is similar to neighboring wild-type cells. The data are shown as the percentage of the respective baseline before LTP induction (mean  $\pm$  SEM). Sample traces show EPSCs before and 30 min after LTP induction in paired control (black) and replacement neurons (green). (Scale bars: 100 pA and 25 ms.) All of the statistical analyses are compared with respective control neurons by the two-tailed Wilcoxon signed-rank sum test.

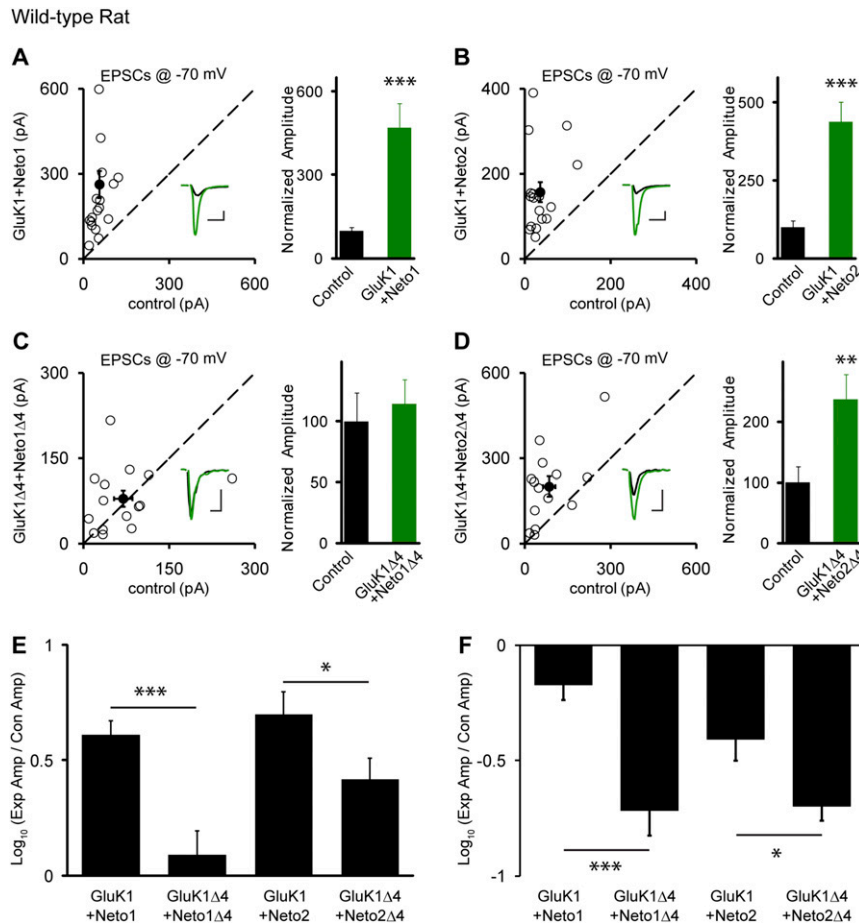

**Fig. 54.** PDZ-binding motif-mediated interaction is required for synaptic targeting of GluK1/Neto receptors. Rat hippocampal slice cultures were biologically transfected with indicated constructs, and dual whole-cell recordings were applied to examine evoked EPSCs. (A–D) Open and filled circles represent amplitudes of EPSCs for single pairs and mean  $\pm$  SEM, respectively. (Insets) Sample current traces from control (black) and experimental (green) cells. [Scale bars: 100 pA and 25 ms (A and B) and 50 pA and 25 ms (C and D) for representative traces.] Bar graphs show normalized EPSC amplitudes (mean  $\pm$  SEM) (GluK1/Neto1: A,  $n = 19$ ,  $470.65 \pm 85.60\%$  control,  $***P < 0.0005$ ; GluK1/Neto2: B,  $n = 17$ ,  $689.52 \pm 195.16\%$  control,  $***P < 0.0005$ ; GluK1 $\Delta$ 4/Neto1 $\Delta$ 4: C,  $n = 15$ ,  $114.09 \pm 20.36\%$  control,  $P > 0.05$ ; GluK1 $\Delta$ 4/Neto2 $\Delta$ 4: D,  $n = 14$ ,  $236.51 \pm 41.54\%$  control,  $**P < 0.005$ ) presented in scatter plots. All of the statistical analyses are compared with respective control neurons by the two-tailed Wilcoxon signed-rank sum test. (E) Logarithm summary of the EPSC amplitudes ratio between the experimental and respective control neurons (mean  $\pm$  SEM) for the above four experimental groups [GluK1/Neto1 ( $0.61 \pm 0.06$ ) vs. GluK1 $\Delta$ 4/Neto1 $\Delta$ 4 ( $0.09 \pm 0.11$ ),  $***P < 0.001$ ; GluK1/Neto2 ( $0.70 \pm 0.10$ ) vs. GluK1 $\Delta$ 4/Neto2 $\Delta$ 4 ( $0.42 \pm 0.09$ ),  $*P < 0.05$ ]. All statistical analyses of the different groups are tested using the Mann–Whitney  $U$  test. It should be noted that the raw data of GluK1/Neto1 and GluK1/Neto2 are reused from our previous study (26). (F) Logarithm summary of the EPSC amplitudes ratio between the experimental and respective control neurons (mean  $\pm$  SEM) for the four replacement experimental groups in Fig. 3 [GluK1/Neto1 ( $-0.17 \pm 0.06$ ) vs. GluK1 $\Delta$ 4/Neto1 $\Delta$ 4 ( $-0.72 \pm 0.11$ ),  $***P < 0.001$ ; GluK1/Neto2 ( $-0.41 \pm 0.09$ ) vs. GluK1 $\Delta$ 4/Neto2 $\Delta$ 4 ( $-0.70 \pm 0.06$ ),  $*P < 0.05$ ]. All statistical analyses of the different groups are tested using the Mann–Whitney  $U$  test.
